# MIND TO MIND

*Creative writing that explores the abstract side  
of our profession and our lives*

*Carol Wiley Cassella, M.D., Editor*

**0600**

T. J. Conahan, M.D.\*

0600

WALKING to the hospital

I pass

Two couples leaving

Walking close together

One of each pair in tears

A parent has died.

\* University of Pennsylvania, Philadelphia, Pennsylvania. conahant@uphs.upenn.edu

Accepted for publication March 30, 2011.

Copyright © 2011, the American Society of Anesthesiologists, Inc. Lippincott Williams & Wilkins. Anesthesiology 2011; 115:1125
